# Supplementary material for: E46K mutant α-synuclein is more degradation resistant and exhibits greater toxic effects than wild-type α-synuclein in Drosophila models of Parkinson's disease
Source: PLoS One. 2019 Jun 26;14(6):e0218261. doi: 10.1371/journal.pone.0218261 (PMC6594597; doi:10.1371/journal.pone.0218261)
Supplement: S1 File — (XLSX) [file pone.0218261.s006.xlsx]

## Sheet: Fig1
B	GMR-Gal4	n=4 each genotype
	WT	A30P	A53T	E46K	G51D	H50Q
	1.16244	1.42996	1.12812	1.03049	1.20524	0.827145
	1.12115	1.06567	1.27353	1.09255	1.01371	0.912735
	1.012	0.707859	0.958307	0.901439	1.01009	0.844383
	0.704406	0.980833	0.667558	0.719786	0.693881	0.614768
C	nSyb-Gal4	n=3 each genotype
	WT	A30P	A53T	E46K	G51D	H50Q
	1.00279	0.856824	0.900659	0.964421	0.982737	0.884891
	1.15128	1.14848	0.943315	1.00639	1.15073	0.883935
	0.845928	0.990354	0.85382	1.23755	1.04609	1.09903

## Sheet: Fig3
A		Aging		n=5 each week each genotype
	Age (weeks)	+					WT					A30P					A53T					E46K					G51D					H50Q
	1	4.18182	4.52857	4.67143	4.28889	4.58333	2.56364	4.18182	4.42	4.10588	3.625	4.49091	4.01539	4.46154	4.32941	4.32727	4.26667	4.63333	4.35714	3.74444	4.55	4.65	4.27273	4.2	3.9	4.15	3.94545	4.57333	4.56667	4.56667	4.46667	4.09091	4.01539	3.97143	4.2875	4.36364
	2	4.72727	4.62857	4.54286	4.38889	4.05	3.81818	4.27273	3.38	4.11765	4.375	4.01818	3.8	4.30769	4.34118	4.03636	3.25	3.66667	3.84286	3.05556	3.975	3.43333	3.05455	3.6125	3.33333	4.14286	4.07273	3.91429	4	3.1	3.23333	3.96364	3.66154	3.75714	3.075	3.56364
	3	4.83636	4.5	4.48571	4.01111	3.96364	4.43636	3.92727	4.1	3.81176	3.725	3.92727	4.32308	4.07692	3.87059	3.90909	2.73333	3.85	3.67143	2.66667	2.5	3.43333	3.29091	3.525	2.73333	4.05714	2.63636	4.1	3.5	3.65	3.26667	3.30909	2.50769	2.82857	2.49231	2.98182
	4	4.49091	4.7	4.48571	3.76667	3.98182	3.54546	2.86667	2.26	3.51765	3.825	4.09091	3.44615	3.72308	3.47059	4.03636	2.06667	3.23333	2.52857	2.41111	2.85	2.56667	2.61818	2.01333	2.3	4.08571	2.94545	3.66154	3.23333	2.78333	3.2	2.90909	1.46154	2.70769	2.24615	3.07273
	5	4.63636	4.41429	4.21429	3.52222	3.6	3.18182	0.525	1.12	2.16471	2.975	2.83636	3.15385	1.67692	3.42353	3.16364	1.66667	2.9	3.24286	2.21111	2.625	2.81818	3.10909	2.76	1.77778	1.77143	1.74545	3.18461	2.9	0.166667	2.6	2.49091	2.15385	1.87692	2.61538	3.72727
	6	3.03636	4.21429	3.3	3.05556	1.06	1.6	1.05714	1.22	1.18823	0.742857	2.16364	2.66154	2.89231	0.882353	2.45455	2.33333	2.55	1.04286	1.26667	1.25	1.6	1.6	2.10769	1.22222	1.56	0.0909091	2.63077	1.6	1.12727	1.26667	2.38	1.89231	0.907692	1.58462	2.92727
	7	1.90909	0.685714	2.91429	2.25556	2.525	0.714286	0.5	0.28	0.3375	0.85	0.345454	1.67692	2.84615	1.27059	1.05455	1.55	1.43333	2.30769	1.58889	0.971429	0.963636	0.96	0.846154	1.18889	1	1	1.4	0.825	0.0222222	0.533333	1.02222	0.938461	1.48	1.46154	1.85455
B		3 weeks		n=5 each genotype
		+	WT	A30P	A53T	E46K	G51D	H50Q
		4.83636	4.43636	3.92727	2.73333	3.43333	2.63636	3.30909
		4.5	3.92727	4.32308	3.85	3.29091	4.1	2.50769
		4.48571	4.1	4.07692	3.67143	3.525	3.5	2.82857
		4.01111	3.81176	3.87059	2.66667	2.73333	3.65	2.49231
		3.96364	3.725	3.90909	2.5	4.05714	3.26667	2.98182
C		5 weeks		n=5 each genotype
		+	WT	A30P	A53T	E46K	G51D	H50Q
		4.63636	3.18182	2.83636	1.66667	2.81818	1.74545	2.49091
		4.41429	0.525	3.15385	2.9	3.10909	3.18461	2.15385
		4.21429	1.12	1.67692	3.24286	2.76	2.9	1.87692
		3.52222	2.16471	3.42353	2.21111	1.77778	0.166667	2.61538
		3.6	2.975	3.16364	2.625	1.77143	2.6	3.72727

## Sheet: Fig4
B	GMR-Gal4	n=8 each genotype
	WT	A30P	A53T	E46K	G51D	H50Q
	1	1.18822	1.98621	2.3095	0.929562	1.03184
	1	0.807728	1.05987	1.02114	0.990441	1.20457
	1	0.731816	1.05085	1.47119	1.20018	1.26372
	1	1.83673	2.05422	2.66811	1.99164	2.53796
	1	0.888341	1.01413	1.99659	0.944885	1.77473
	1	0.607299	0.952911	1.16717	0.599004	0.777275
	1	0.918084	0.974984	1.4723	0.805185	1.10305
	1	0.731618	0.714208	0.960879	0.839549	0.858008
C	nSyb-Gal4	n=6 each genotype
	WT	A30P	A53T	E46K	G51D	H50Q
	1	0.742	1.318	1.628	1.013	1.182
	1	0.878	1.34	1.836	1.006	1.12
	1	0.931	0.91	1.09	0.566	0.692
	1	0.748	0.999	1.735	0.815	0.952
	1	0.659	0.842	0.974	0.807	0.93
	1	0.623	0.648	1.908	0.812	0.691

## Sheet: Fig5
C	Chase	n=9 (day1 or day7) or n=6 (day4) each genotype
	Age (days)	WT									E46K
	1	100	100	100	100	100	100	100	100	100	100	100	100	100	100	100	100	100	100
	4				47.9718	93.7262	45.8804	50.0134	91.6376	26.6996				107.199	102.236	75.997	105.568	79.6428	135.275
	7	26.9073	19.2723	3.69346	28.8416	59.242	43.0641	2.15142	35.5578	12.67	64.4887	63.9293	5.57142	28.2127	17.6252	28.0987	51.1453	45.1284	22.0537

## Sheet: FigS1
	genotype	sample1	sample2	sample3	average	SE
	nSyb-Gal4>aSyn-WT	1.00279	1.15128	0.845928	1	0.088158
	+>aSyn-WT	0.00502188	0.018358		0.0116899	0.00666806
	+>aSyn-A30P	0.0081337	0.0144931		0.0113134	0.00317969
	+>aSyn-A53T	0.00594793	0.0156215		0.0107847	0.00483676
	+>aSyn-E46K	0.006827	0.0147286		0.0107778	0.00395078
	+>aSyn-G51D	0.00733177	0.015559		0.0114454	0.00411362
	+>aSyn-H50Q	0.00872965	0.0150268		0.0118782	0.00314856

## Sheet: FigS2
	GMR-Gal4	n=4 each genotype
	WT	WT (R)
	1.16244	0.776333
	1.12115	0.729229
	1.012	0.648414
	0.704406	0.41004

## Sheet: FigS4
	GMR-Gal4	n=8 each genotype
	WT	WT (R)
	1	0.587979
	1	0.929414
	1	0.939654
	1	0.340777
	1	0.32252
	1	0.508703
	1	0.419718
	1	0.582199
